# Supplementary material for: Effects of Special Therapeutic Footwear on the Prevention of Diabetic Foot Ulcers: A Systematic Review and Meta-Analysis of Randomized Controlled Trials
Source: Hindawi journal article supplement (doi:10.1155/2022/9742665), 2022-09-26
Supplement: f3 [file 9742665.f3.pdf]

**Appendix 3:** Subgroup analysis for patients with a history of foot ulceration.

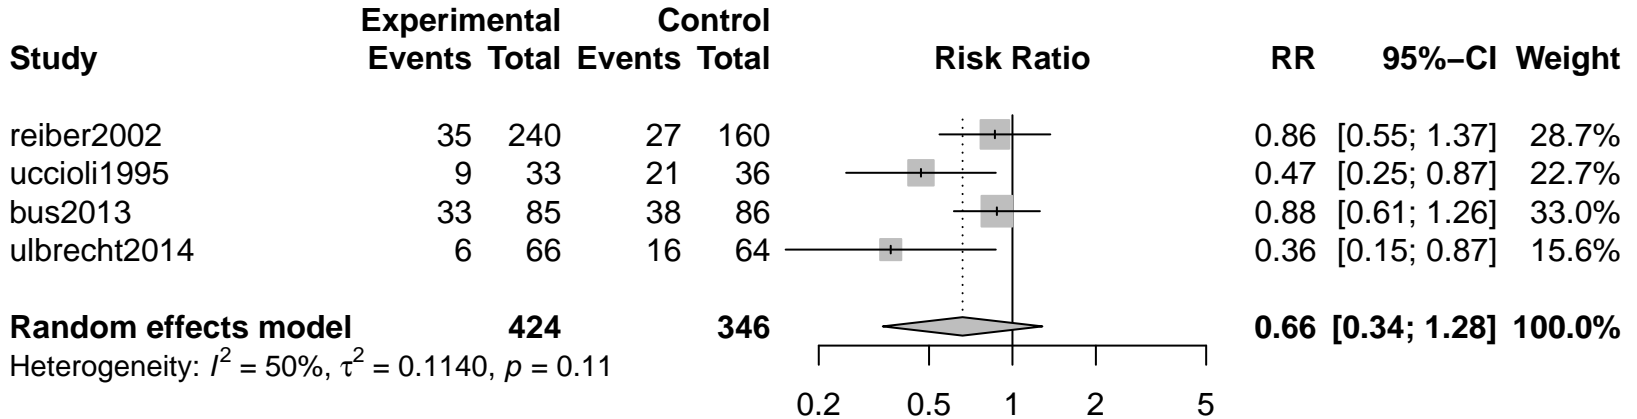

**Figure 5.** Effect of special therapeutic footwear in reducing the recurrence of diabetic foot ulcers among patients with a history of foot ulceration.
